# Supplementary material for: Piezo1-induced durotaxis of pancreatic stellate cells depends on TRPC1 and TRPV4 channels
Source: bioRxiv or medRxiv preprint supplement (doi:10.1101/2023.12.22.572956), 2024-04-15
Supplement: Supplementary file [file media-1.pdf]

**Supporting Information for**

**Piezo1-induced durotaxis of pancreatic stellate cells depends on TRPC1 and TRPV4 channels**

Ilka Budde<sup>1</sup>, André Schlichting<sup>2</sup>, David Ing<sup>1</sup>, Sandra Schimmelpfennig<sup>1</sup>, Joelle M-J Romac<sup>3</sup>, Sandip M Swain<sup>3</sup>, Rodger A Liddle<sup>3</sup>, Angela Stevens<sup>2</sup>, Albrecht Schwab<sup>1</sup>, Zoltán Pethő<sup>1\*</sup>

<sup>1</sup> Institute of Physiology II, University of Münster, Robert-Koch Str. 27B, 48149, Germany

<sup>2</sup> Institute for Analysis and Numerics, University of Münster, Einsteinstr. 62, 48149, Germany

<sup>3</sup> Department of Medicine, Duke University, Durham, North Carolina, 27708, USA

\* Corresponding author: Zoltán Pethő; Email: pethoe@uni-muenster.de

**This PDF file includes:**

Supporting text  
Figures S1 to S6  
Table S1  
Supporting references  
Numerics  
Numerics References

**Other supporting materials for this manuscript include the following:**

Raw data file

## Supporting Text

### Supporting methods for Fig. S3

**Calcium imaging:** Live cell calcium imaging was performed on quiescent PSCs cultured on the Matrigel-coated plates using Calcium 6-QF dye (Molecular Devices) as previously described(1, 2). Cells were imaged in HBSS buffer with 2 mM  $\text{Ca}^{2+}$ . Imaging was performed using a Zeiss Axio observer Z1 with a 20× objective at room temperature, and the intensity of Calcium 6-QF over time was analyzed using MetaMorph image processing and analysis software (Molecular Devices). Faintly and highly fluorescent-loaded cells were excluded from the analysis. The chemicals used in calcium imaging experiments included Yoda1 (Tocris, catalog 5586).

**Immunostaining:** Mouse PSCs were fixed with 4% paraformaldehyde for 10 minutes at room temperature and then treated with 0.1% Triton X-100 (2). Cells were immunostained with a chicken anti-GFAP antibody (Abcam, 4674) or rabbit anti-Cre antibody (Novus Biological, NB1000-56133) at 2°C–8°C. Secondary antibodies included DyLight 488-conjugated anti-chicken IgG (Jackson ImmunoResearch, 703-546-155), or CY 3-conjugated anti-rabbit IgG (Jackson ImmunoResearch), used for 1 hour at room temperature. All images were captured with a Zeiss Axio observer Z1 with a 20× objective.

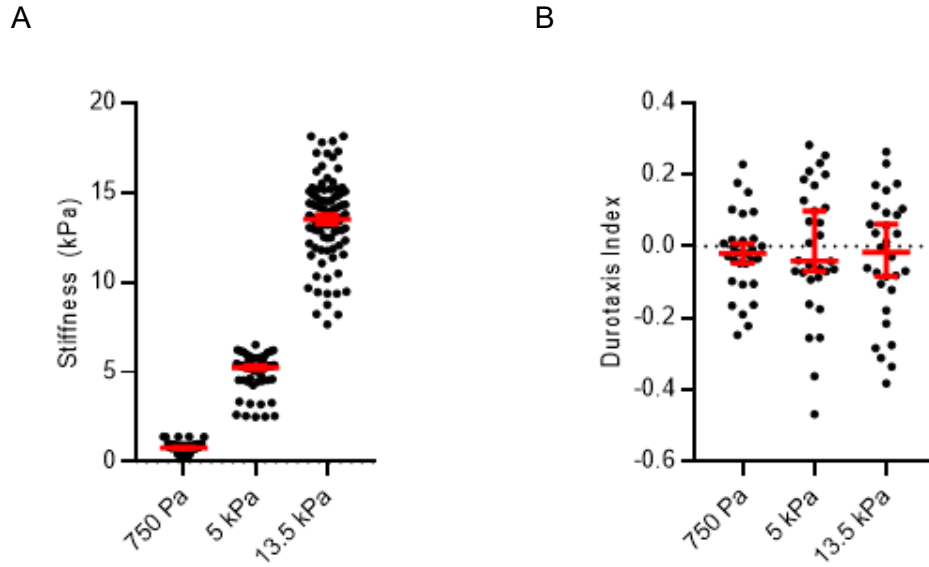

**Fig. S1. PSCs on hydrogels with constant stiffness migrate non-directionally**

**A)** Scatter plot shows homogeneous gel stiffnesses measured from  $n \geq 10$  points of  $N=5$  gels. **B)** Scatter plot indicates durotaxis indices of PSCs derived from the trajectories in Fig. 1B. ( $n=30$  PSCs in  $N=3$  independent experiments). Data in (A) is mean  $\pm$  SEM and in (B) median  $\pm$  95% CI. Statistical test in (B) is one-sample t-test.

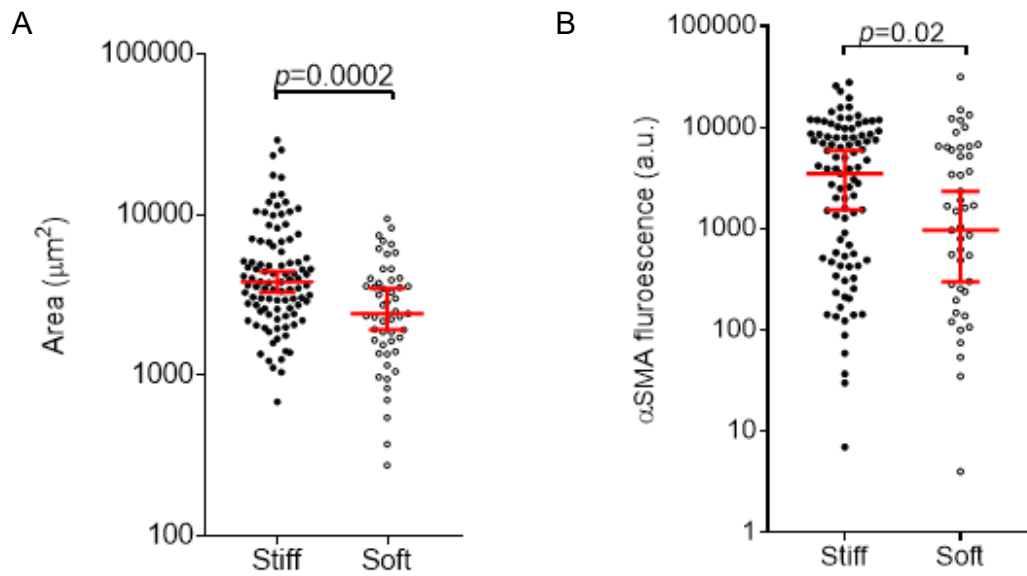

**Fig. S2. PSC immunostaining reveals higher cell area and  $\alpha$ SMA intensity on a stiffer substrate**

**A)** Scatter plot shows cellular areas derived from  $\alpha$ SMA-stained PSCs depicted in Fig. 2E. **B)** Scatter plot of  $\alpha$ SMA fluorescence intensity of PSCs on the stiff and soft parts of the gradient hydrogel. n cells measured / N experiments  $\geq 51/4$ . Data in (A) and (B) are median  $\pm$  95% CI. Statistical test are Mann-Whitney U-tests.

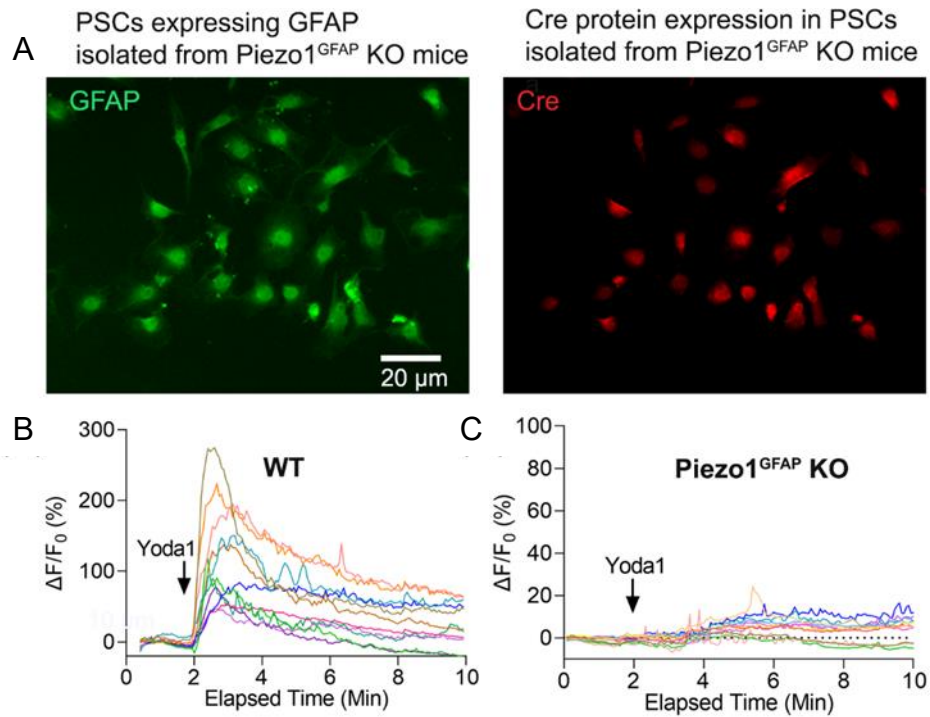

**Fig. S3. Piezo1 deletion in GFAP expressing mouse PSCs**

**A)** Images showing PSCs isolated from mouse line B6. Cg-Tg (*GFAP-cre/ERT2; Piezo1<sup>fl/f</sup>*) after tamoxifen injection (referred to as *Piezo1<sup>GFAP</sup>* KO mice) cultured for 3 days in a Matrigel-coated plate as described previously (1), expressed both stellate cell marker GFAP (green) and Cre protein (red). Scale bar: 20  $\mu\text{m}$ . **B)** and **C)** Piezo1 agonist Yoda1 (5  $\mu\text{M}$ ) induces an elevation of the intracellular  $\text{Ca}^{2+}$  concentration in PSCs isolated from wild type but not from *Piezo1<sup>GFAP</sup>* KO mice, confirming that successful deletion of Piezo1 in GFAP expressing PSCs,  $n=12$  cells. Each trace represents Yoda1-induced single cell relative fluorescence intensity ( $\Delta F/F_0$ ) of the calcium 6-QF dye over time.  $\Delta F$  is the change in fluorescence intensity ( $F-F_0$ ), and  $F_0$  is the basal fluorescence intensity before Yoda1 application.

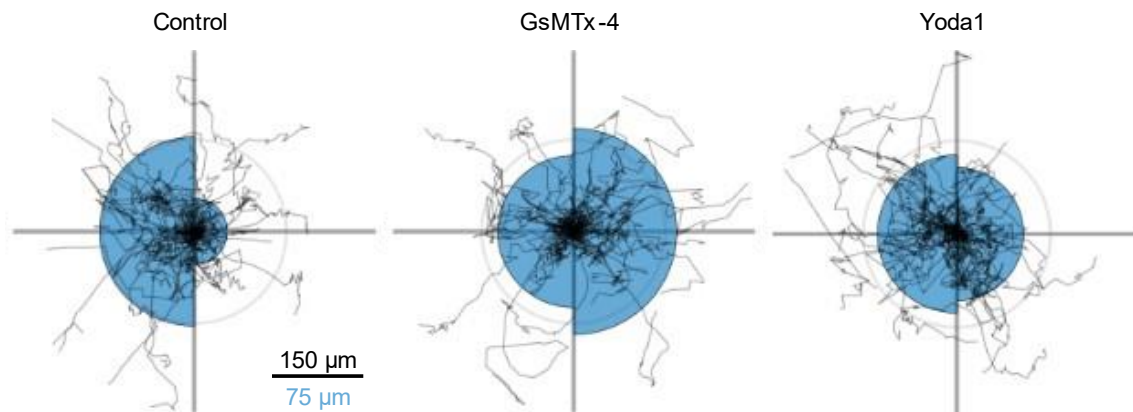

**Fig. S4. Durotaxis polar plots of PSCs with pharmacological Piezo1 modulation**

The durotaxis plot data aims to support Fig. 3C. Durotaxis polar plots depict individual PSC trajectories over 24 h (black lines). The radius of the blue half circles is proportional to the mean cellular displacement into the directions 0° and 180°, respectively. Radial lines indicate 0°, 90°, 180°, 270°.

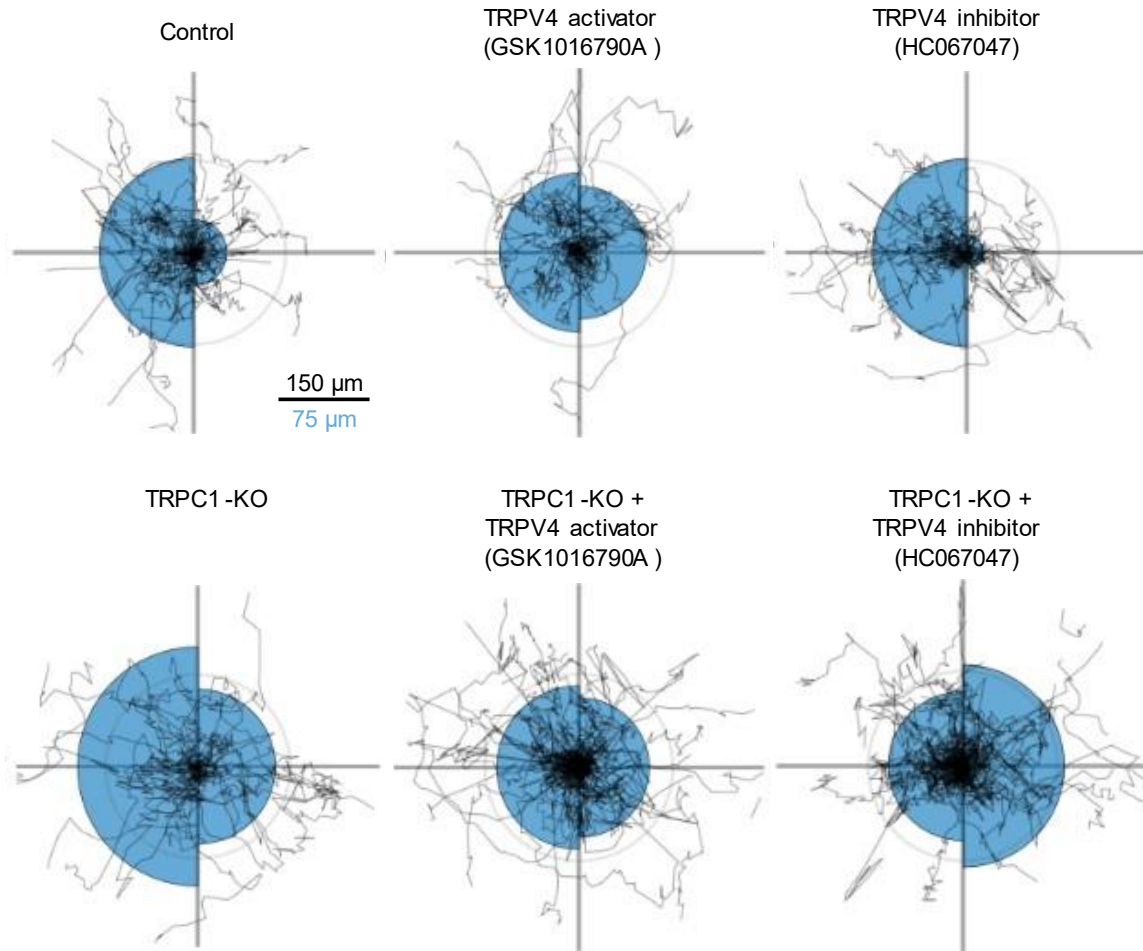

**Fig. S5. Durotaxis polar plots of PSCs with TRPV4 and TRPC1 modulation**

The durotaxis plot data aims to support Fig. 5A. Durotaxis polar plots depict individual PSC trajectories over 24 h (black lines). The radius of the blue half circles is proportional to the mean cellular displacement into the directions  $0^\circ$  and  $180^\circ$ , respectively. Radial lines indicate  $0^\circ$ ,  $90^\circ$ ,  $180^\circ$ ,  $270^\circ$ .

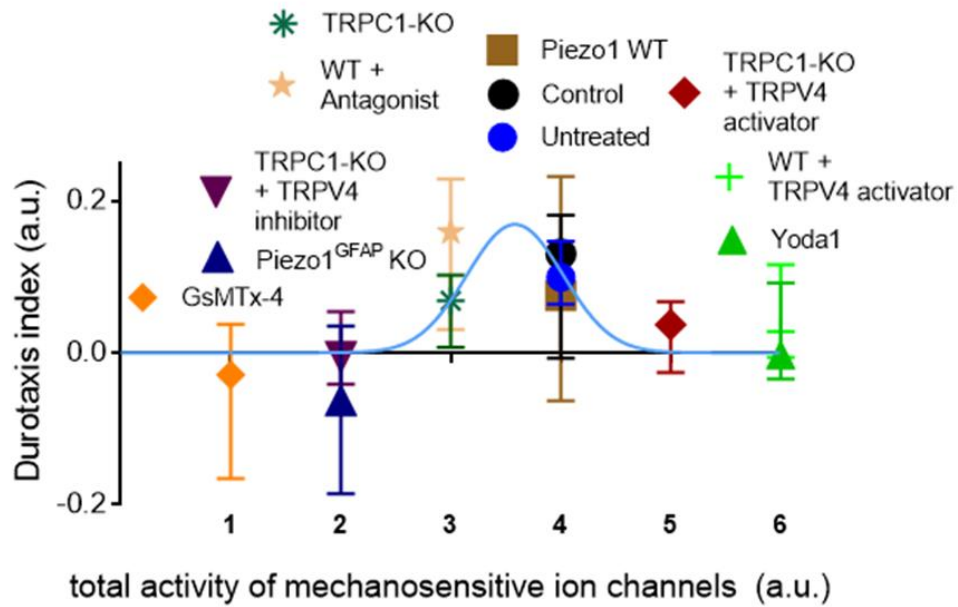

**Fig. S6. Durotaxis requires intermediate activity of mechanosensitive ion channels**

The depicted data shows details regarding Fig. 5C. Scatter plot shows the durotaxis index as a function of the total ion channel activity, derived from Fig. 5A and B. Inhibitor and activator refer to TRPV4 modulation with HC-0606006 and GSK101489, respectively. The blue line corresponds to a gaussian curve fit from Fig. 5c, indicating the bell-shaped relationship between channel activity and durotaxis. Data points are median  $\pm$  95% CI.



## Supporting Tables

**Table S1.** Acrylamide mixture used for hydrogels with constant stiffness

| Acrylamide (%) | Bisacrylamide (%) | Hydroxyacrylamide (%) | Volume Acrylamide mix ( $\mu$ l) | Volume PBS ( $\mu$ l) | Stiffness |
|----------------|-------------------|-----------------------|----------------------------------|-----------------------|-----------|
| 2,5            | 0,07              | 0,8                   | 53                               | 447                   | 750 Pa    |
| 3,54           | 0,1               | 1,15                  | 75                               | 425                   | 5 kPa     |
| 7,08           | 0,2               | 2,3                   | 150                              | 350                   | 13.5 kPa  |

## Supporting References

1. S. M. Swain, J. M. J. Romac, S. R. Vigna, R. A. Liddle, Piezo1-mediated stellate cell activation causes pressure-induced pancreatic fibrosis in mice. *JCI Insight* **7** (2022).
2. S. M. Swain, R. A. Liddle, Piezo1 acts upstream of TRPV4 to induce pathological changes in endothelial cells due to shear stress. *Journal of Biological Chemistry* **296** (2021).
